# Supplementary material for: Collagen/Gelatin Sponges (CGSs) Provide Both Protection and Release of bFGF: An In Vitro Study
Source: Hindawi journal article supplement (doi:10.1155/2019/4016351), 2019-02-19
Supplement: f1 [file 4016351.f1.pdf]

## Supplementary materials

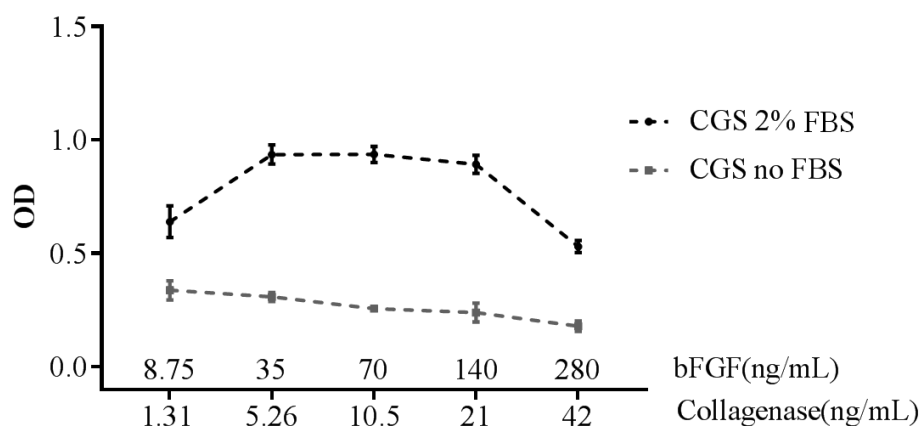

**Supplementary Figure 1: The effect of the bFGF concentration on fibroblast proliferation.** Proliferation of fibroblasts at different concentration of bFGF in the absence and in the presence of FBS. CGS indicates that bFGF was added to CGS (N=6).

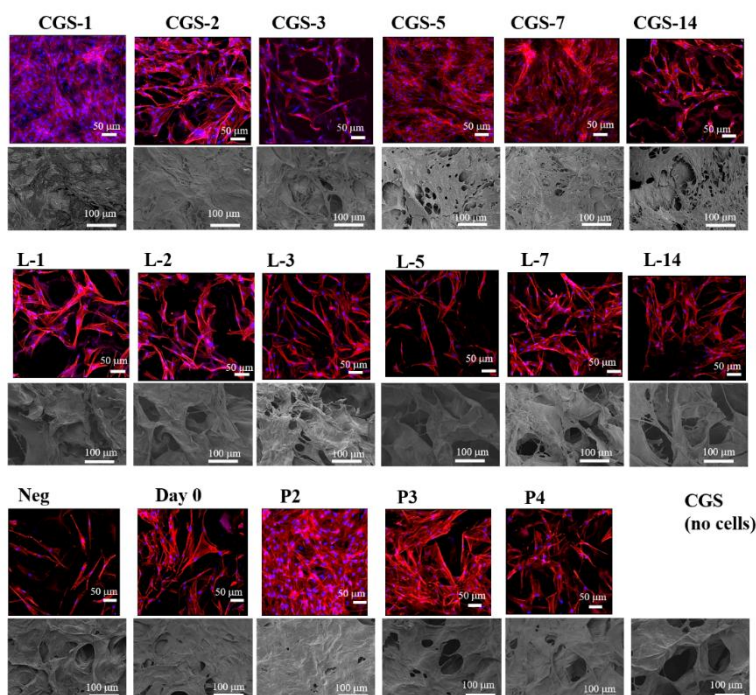

**Supplementary Figure 2. Confocal fluorescence microphotographs and SEM images.** Phalloidin (red)/ Hoechst (blue). CGS-x indicates that bFGF was added to CGS and x indicateds the number of days. L-x indicates that bFGF was added to

small tubes and kept under the same conditions. x indicates the number of days.  
Control samples: P2, DMEM + 10% FBS; P3, DMEM + 2% FBS; P4, DMEM + 0.1% FBS; Neg, DMEM. Samples: DMEM + 0.1% FBS.
